# Supplementary material for: Electronic and architecture engineering of hammer-shaped Ir–NiMoO4-ZIF for effective oxygen evolution
Source: Royal Society of Chemistry journal article supplement (doi:10.1039/d2ce00924b), 2022-01-01
Supplement: d2ce00924b1.pdf [file d2ce00924b1.pdf]

**Supporting Information for**  
**Electronic and Architecture Engineering of Hammer-Shaped Ir-**  
**NiMoO<sub>4</sub>-ZIF for Effective Oxygen Evolution**

Ming Song <sup>a</sup>, Xinhua Lu <sup>a</sup>, Minglin Du<sup>a</sup>, Zhenyang Chen<sup>a</sup>, Chen Zhu <sup>a</sup>, Hui Xu <sup>a</sup>,

Wenjing Cheng <sup>b</sup>, Wenchang Zhuang<sup>a\*</sup>, Zhao Li<sup>a\*</sup>, Lin Tian <sup>a, b \*</sup>

*<sup>a</sup> School of Materials and Chemical Engineering, Xuzhou University of Technology*

*221018, PR China*

*<sup>b</sup> School of Chemistry and Environmental science, Yili Normal University, 835000, PR*

*China*

*\*Corresponding author: Tel: 86-516-83105518*

*Email: xzittl@xzit.edu.cn (L. Tian)*

## **1. Preparation of NiMoO<sub>4</sub> nanorods**

The NiMoO<sub>4</sub> nanorods were obtained via a facile hydrothermal method according to previous works. Briefly, 582 mg Ni(NO<sub>3</sub>)<sub>2</sub>•6H<sub>2</sub>O, 484 mg Na<sub>2</sub>MoO<sub>4</sub>•2H<sub>2</sub>O, and 20 mL deionized water were mixed to form a clear solution. The mixture was transferred into a Teflon-lined stainless autoclave (50 mL) and heated at 150 °C for 6 h. After reaction, NiMoO<sub>4</sub> was re-dispersed into 10 mL deionized water for further use.

## **2. Preparation of NiMoO<sub>4</sub>-ZIF**

300 mg 2-MIM was dissolved into 14 mL deionized water. Then, 0.5 mL previously prepared NiMoO<sub>4</sub> nanorods mixture was added to above solution. Then, 2 mL of Co(NO<sub>3</sub>)<sub>2</sub> (20 mg) solution containing 1 mg CTAB was added to above solution. After 20 min of reaction with drastic stirring at room temperature, the product was centrifuged, washed, and dried.

## **3. Preparation of Ir-NiMoO<sub>4</sub>-ZIF**

The freshly prepared NiMoO<sub>4</sub>-ZIF was re-dispersed into 10 mL ethanol. 5 mg IrCl<sub>3</sub> was also dispersed into 5 mL ethanol under sonication. Then, the IrCl<sub>3</sub> solution was dropped into the NiMoO<sub>4</sub>-ZIF under magnetic stirring. After 3 h of reaction with drastic stirring at room temperature, the product was centrifuged, washed, and dried. The Ir-NiMoO<sub>4</sub> and Ir-ZIF were also prepared via the same methods except for replacing the NiMoO<sub>4</sub>-ZIF with NiMoO<sub>4</sub> and ZIF, respectively.

## **4. Characterizations**

The synthesized samples were characterized by X-ray powder diffraction (XRD) coupled with a Cu radiation source ( $\lambda = 0.15406$  nm). Transmission electron

microscope (TEM), high-resolution transmission electron microscopy (HRTEM), and energy-dispersive X-ray spectroscopy (EDS) were carried out on a JEOL-2100 with 200 kV. XPS data were collected with an SSI S-Probe XPS spectrometer. The binding energy was adjusted employing the C 1s peak at 284.8 eV.

## **5. Electrochemical measurements**

The electrochemical measurements were carried on a CHI 760E electrochemical workstation with a three-electrode standard system in 1 M KOH solution. The linear sweep curves (LSV) were obtained at a scan rate of 5 mV s<sup>-1</sup>. Before LSV tests, the catalysts were activated by 20 cyclic voltammetry cycles at 50 mV s<sup>-1</sup>. The iR drop was compensated at 95% before each measurement. Tafel plots were evolved from the LSV and obtained by the Tafel equation. Electrochemical impedance spectroscopy (EIS) were recorded in a range of frequency (1 Hz-1000 kHz) with 5 mA amplitude of current perturbation.

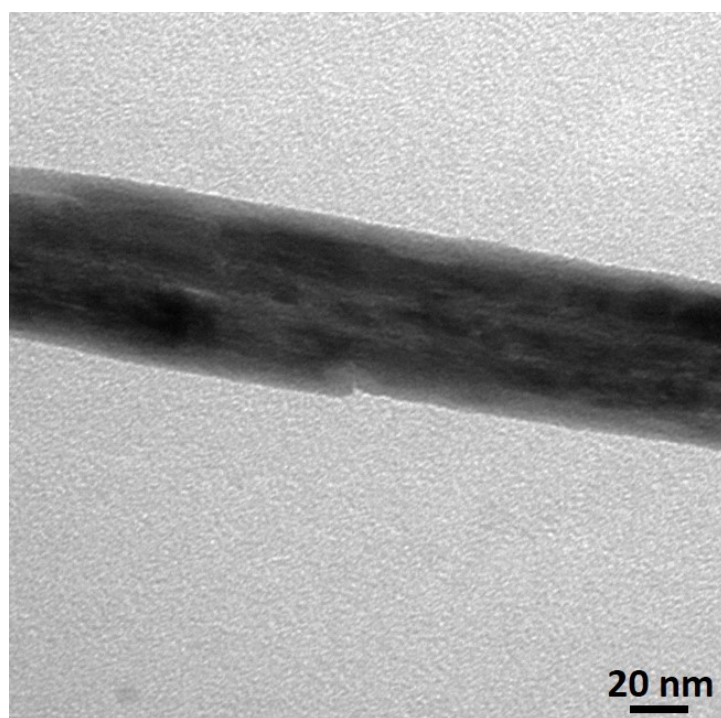

**Fig.S1** Representative TEM image of the NiMoO<sub>4</sub> nanorods.

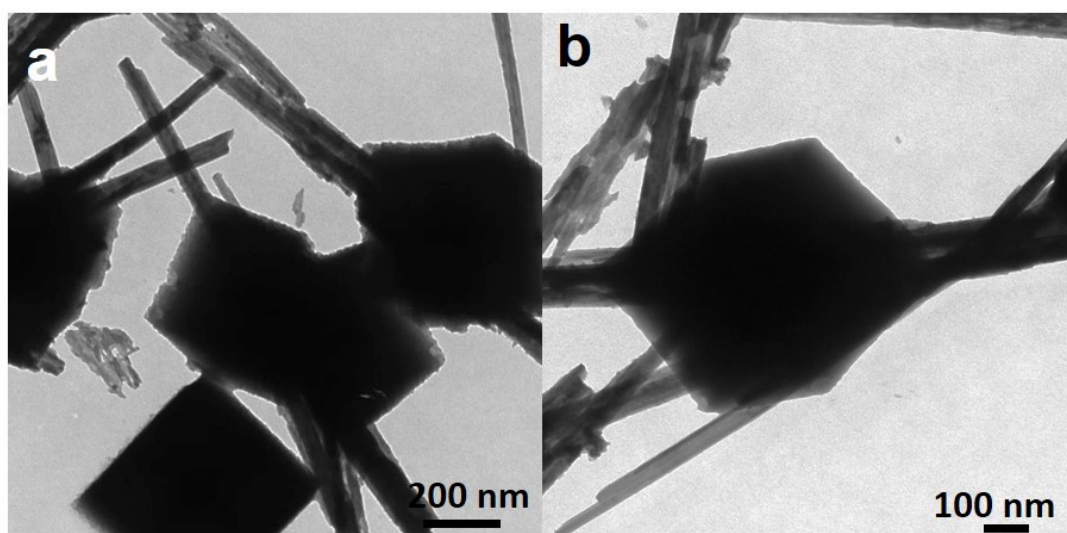

**Fig.S2** Representative TEM image of the NiMoO<sub>4</sub>-ZIF.

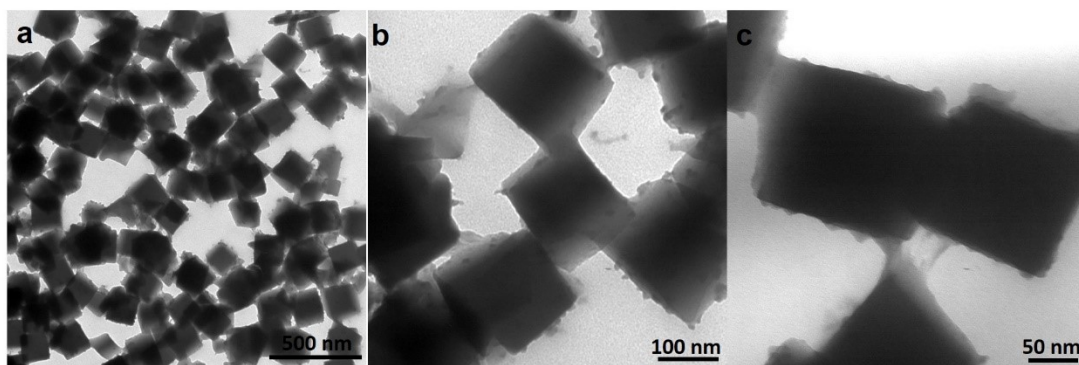

**Fig.S3** TEM images of the Ir-ZIF nanocubes.

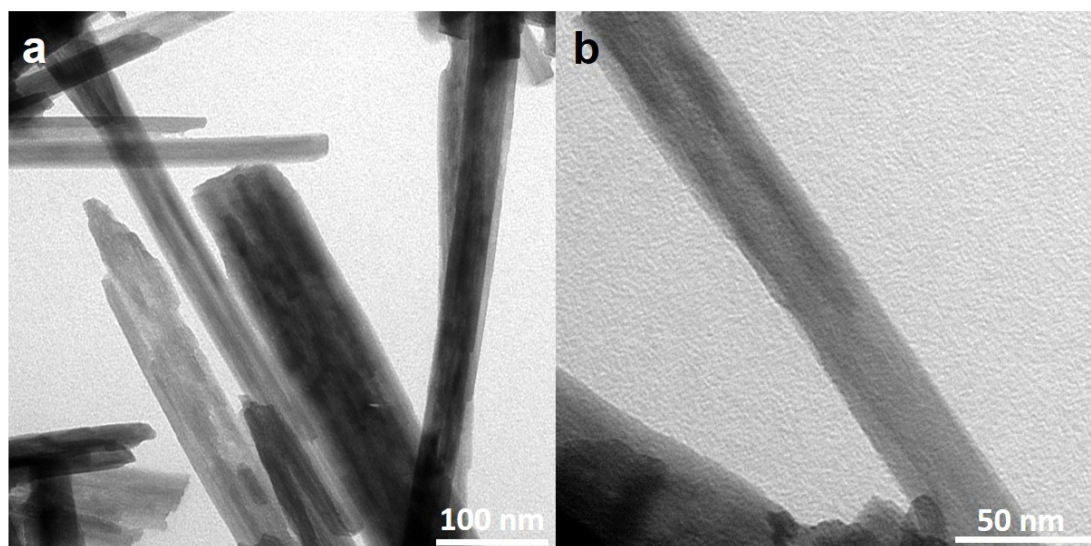

**Fig.S4** TEM images of the Ir-NiMoO<sub>4</sub> nanorods.

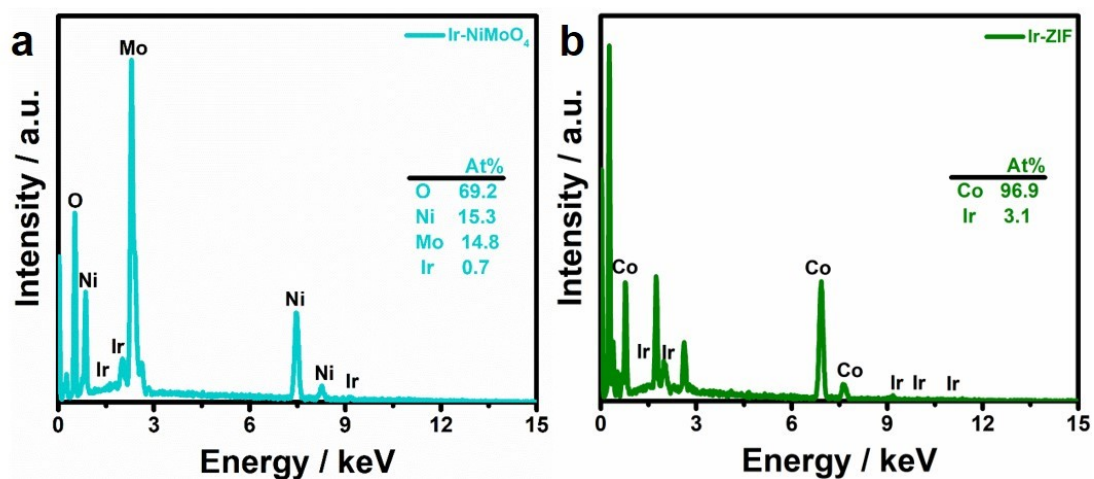

**Fig.S5** EDX spectra of the (a) Ir-NiMoO<sub>4</sub> nanorods and (b) Ir-ZIF nanocubes.

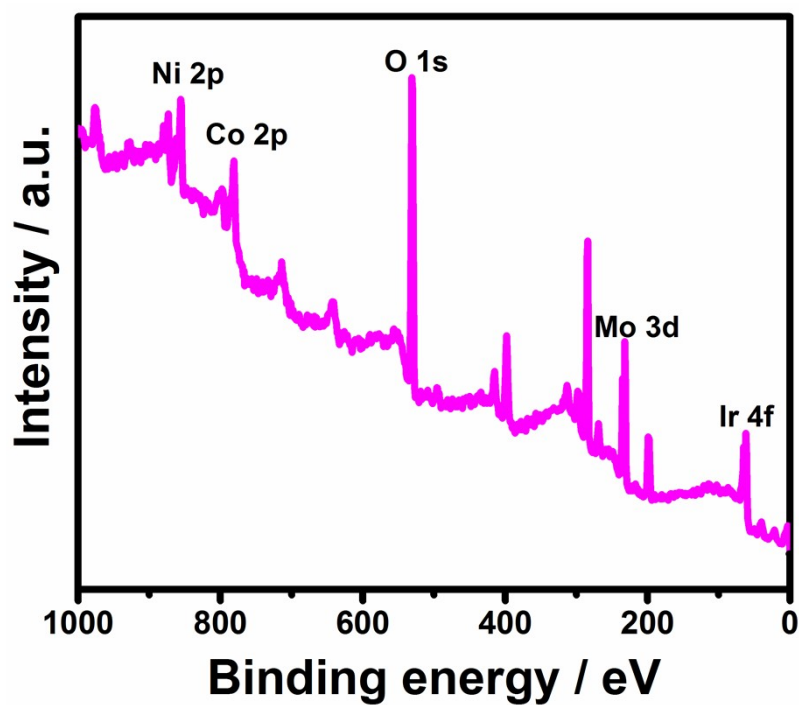

**Fig.S6** XPS survey spectrum of the Ir-NiMoO<sub>4</sub>-ZIF.

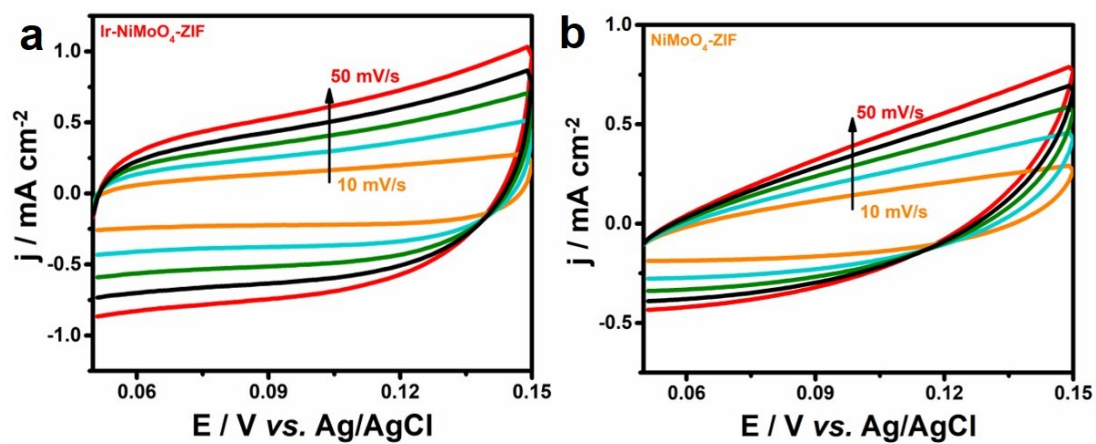

**Fig.S7** CV curves of (a) Ir-NiMoO<sub>4</sub>-ZIF and (b) NiMoO<sub>4</sub>-ZIF at different scan rates.

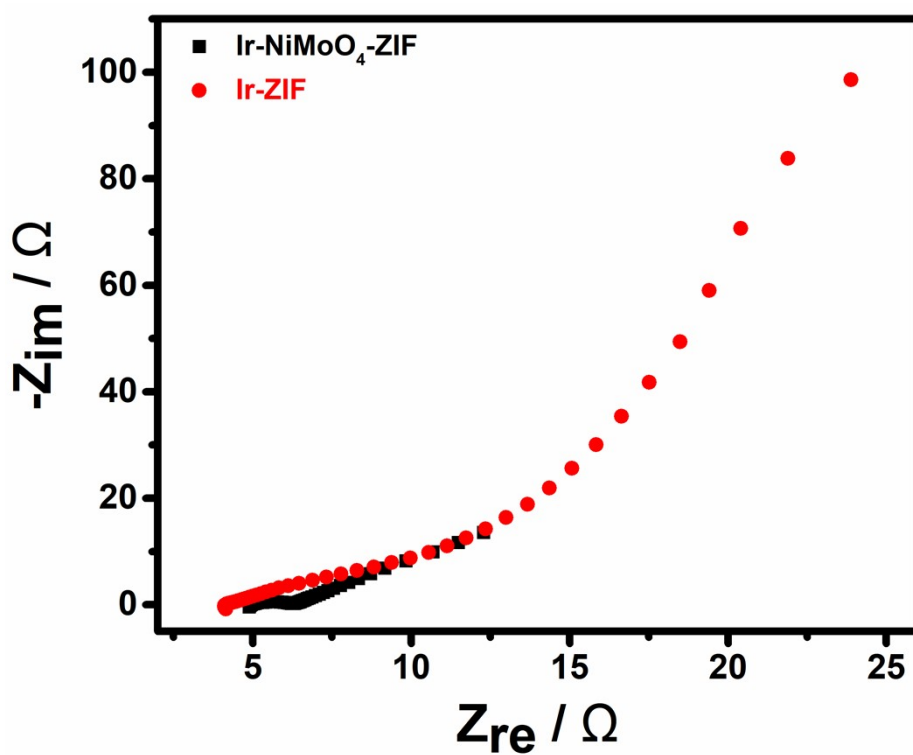

**Fig.S8** Nyquist plot of Ir-NiMoO<sub>4</sub>-ZIF and Ir-ZIF.
